# Supplementary material for: Comparison and improvement of the predictability and interpretability with ensemble learning models in QSPR applications
Source: J Cheminform. 2020 Mar 30;12:19. doi: 10.1186/s13321-020-0417-9 (PMC7106596; doi:10.1186/s13321-020-0417-9)
Supplement: Supplementary file 4 — Additional file 4. The test set of fluorescence with descriptors. [file 13321_2020_417_MOESM4_ESM.csv]

No	MW	AMW	Se	Sp	Si	Me	Mp	Mi	GD	nAT	nSK	nTA	nBT	nBO	nBM	SCBO	RBN	RBF	nDB	nTB	nAB	nH	nC	nN	nO	nP	nS	nF	nCL	nBR	nI	nB	nHM	nHet	nX	H%	C%	N%	O%	X%	nCsp3	nCsp2	nCsp	nStructures	totalcharge	nCIC	nCIR	TRS	Rperim
6	401.2	10.843	38.586	28.557	40.426	1.043	0.772	1.093	0.088	37	27	5	41	31	19	41	0	0	1	0	18	10	20	0	5	0	0	0	2	0	0	0	2	7	2	27	54.1	0	13.5	5.4	1	19	0	1	0	5	9	29	23
8	239.37	6.469	36.214	24.483	41.526	0.979	0.662	1.122	0.124	37	18	3	38	19	13	26	3	0.079	1	0	12	19	16	2	0	0	0	0	0	0	0	0	0	2	0	51.4	43.2	5.4	0	0	3	13	0	1	1	2	2	12	12
13	475.44	9.322	52.418	37.892	55.58	1.028	0.743	1.09	0.067	51	36	5	57	42	28	58.5	1	0.018	5	0	23	15	29	0	7	0	0	0	0	0	0	0	0	7	0	29.4	56.9	0	13.7	0	1	28	0	1	0	7	18	41	31
15	445.21	11.13	42.24	30.466	43.845	1.056	0.762	1.096	0.078	40	30	7	44	34	20	45	1	0.023	2	0	18	10	21	0	7	0	0	0	2	0	0	0	2	9	2	25	52.5	0	17.5	5	1	20	0	1	0	5	9	29	23
16	901.36	10.481	86.538	61.131	95.84	1.006	0.711	1.114	0.047	86	47	9	90	51	20	62	15	0.167	2	0	18	39	36	1	6	0	0	0	0	4	0	0	4	11	4	45.3	41.9	1.2	7	4.7	16	20	0	1	0	5	9	29	23
17	464.87	9.297	51.567	35.892	55.147	1.031	0.718	1.103	0.07	50	33	6	54	37	21	49	4	0.074	3	0	18	17	25	0	7	0	0	0	1	0	0	0	1	8	1	34	50	0	14	2	4	21	0	1	0	5	9	29	23
18	376.33	9.408	41.593	28.75	43.957	1.04	0.719	1.099	0.085	40	28	5	44	32	20	43	1	0.023	2	0	18	12	21	0	7	0	0	0	0	0	0	0	0	7	0	30	52.5	0	17.5	0	1	20	0	1	0	5	9	29	23
19	534.65	7.638	70.211	47.943	77.856	1.003	0.685	1.112	0.06	70	40	4	77	47	22	60	3	0.039	4	0	18	30	33	2	5	0	0	0	0	0	0	0	0	7	0	42.9	47.1	2.9	7.1	0	12	21	0	1	0	8	40	48	32
25	603.36	10.226	62.244	41.954	65.634	1.055	0.711	1.112	0.055	59	41	11	63	45	17	59	7	0.111	11	0	6	18	27	1	11	0	0	0	2	0	0	0	2	14	2	30.5	45.8	1.7	18.6	3.4	5	22	0	1	0	5	8	29	25
31	330.44	7.51	42.952	32.853	47.737	0.976	0.747	1.085	0.092	44	26	0	48	30	28	44	2	0.042	0	0	28	18	26	0	0	0	0	0	0	0	0	0	0	0	0	40.9	59.1	0	0	0	0	26	0	1	0	5	8	30	26
38	532.49	11.094	51.375	35.113	53.216	1.07	0.732	1.109	0.062	48	36	12	51	39	28	56	5	0.098	6	0	22	12	21	2	11	0	2	0	0	0	0	0	2	15	0	25	43.8	4.2	22.9	0	0	21	0	1	-2	4	7	24	20
40	721.82	8.911	83.429	55.972	90.451	1.03	0.691	1.117	0.046	81	50	15	87	56	27	74	6	0.069	9	0	18	31	34	3	11	0	2	0	0	0	0	0	2	16	0	38.3	42	3.7	13.6	0	12	22	0	1	-2	7	17	39	31
43	791.87	8.999	90.967	60.642	98.285	1.034	0.689	1.117	0.041	88	55	15	94	61	30	82	9	0.096	12	0	18	33	37	3	13	0	2	0	0	0	0	0	2	18	0	37.5	42	3.4	14.8	0	10	27	0	1	0	7	17	41	33
46	912.1	10.484	90.92	64.062	97.101	1.045	0.736	1.116	0.039	87	58	17	94	65	37	88	7	0.074	9	0	28	29	35	4	11	0	6	2	0	0	0	0	6	23	2	33.3	40.2	4.6	12.6	2.3	7	28	0	1	1	8	29	46	34
49	178.24	7.427	23.418	17.807	26.076	0.976	0.742	1.086	0.176	24	14	0	26	16	16	24	0	0	0	0	16	10	14	0	0	0	0	0	0	0	0	0	0	0	0	41.7	58.3	0	0	0	0	14	0	1	0	3	6	18	14
51	401.5	7.17	56.552	35.631	63.152	1.01	0.636	1.128	0.076	56	29	8	58	31	10	38	7	0.121	4	0	6	27	22	1	6	0	0	0	0	0	0	0	0	7	0	48.2	39.3	1.8	10.7	0	11	11	0	1	0	3	6	18	14
53	449.58	7.251	62.261	40.358	70.021	1.004	0.651	1.129	0.068	62	33	7	65	36	19	47	8	0.123	3	0	16	29	25	4	4	0	0	0	0	0	0	0	0	8	0	46.8	40.3	6.5	6.5	0	9	16	0	1	1	4	7	23	19
56	367.51	6.806	53.731	34.892	60.815	0.995	0.646	1.126	0.083	54	27	6	56	29	11	37	6	0.107	5	0	6	27	22	2	3	0	0	0	0	0	0	0	0	5	0	50	40.7	3.7	5.6	0	8	14	0	1	1	3	6	18	14
57	645.77	8.61	77.102	50.517	84.242	1.028	0.674	1.123	0.05	75	44	12	78	47	22	63	11	0.141	10	0	12	31	29	3	10	0	2	0	0	0	0	0	2	15	0	41.3	38.7	4	13.3	0	8	21	0	1	0	4	7	24	20
60	488.66	6.981	69.81	45.637	78.768	0.997	0.652	1.125	0.063	70	36	7	74	40	17	51	7	0.095	5	0	12	34	29	3	4	0	0	0	0	0	0	0	0	7	0	48.6	41.4	4.3	5.7	0	13	16	0	1	1	5	11	29	23
62	642.98	6.43	98.108	65.58	112.086	0.981	0.656	1.121	0.048	100	48	10	106	54	23	68	7	0.066	5	0	18	52	43	3	2	0	0	0	0	0	0	0	0	5	0	52	43	3	2	0	20	23	0	1	1	7	26	42	30
63	527.7	7.539	70.6	45.813	78.899	1.009	0.654	1.127	0.062	70	37	8	74	41	17	52	7	0.095	5	0	12	33	27	3	6	0	1	0	0	0	0	0	1	10	0	47.1	38.6	4.3	8.6	0	14	13	0	1	0	5	15	30	22
71	643.51	8.146	80.64	53.392	89.185	1.021	0.676	1.129	0.048	79	47	6	84	52	24	68	14	0.167	8	0	16	32	33	5	6	0	0	2	0	0	0	1	0	14	2	40.5	41.8	6.3	7.6	2.5	8	25	0	1	0	6	9	32	28
73	340.16	8.504	40.84	28.228	44.946	1.021	0.706	1.124	0.093	40	25	4	43	28	15	37.5	4	0.093	4	0	11	15	18	2	2	0	0	2	0	0	0	1	0	7	2	37.5	45	5	5	5	2	16	0	1	0	4	7	22	18
74	608.51	7.703	80.305	51.909	89.517	1.017	0.657	1.133	0.051	79	44	9	83	48	18	60.5	13	0.157	7	0	11	35	31	4	6	0	0	2	0	0	0	1	0	13	2	44.3	39.2	5.1	7.6	2.5	12	19	0	1	0	5	8	27	23
79	365.58	7.947	45.251	33.54	50.781	0.984	0.729	1.104	0.093	46	25	2	49	28	18	38	4	0.082	2	0	16	21	21	2	0	0	2	0	0	0	0	0	2	4	0	45.7	45.7	4.3	0	0	4	17	0	1	1	4	6	22	18
93	455.49	8.282	55.902	38.347	60.907	1.016	0.697	1.107	0.068	55	34	7	59	38	19	51	4	0.068	7	0	12	21	27	1	6	0	0	0	0	0	0	0	0	7	0	38.2	49.1	1.8	10.9	0	4	23	0	1	0	5	11	30	24
101	759.21	7.517	100.621	69.518	113.114	0.996	0.688	1.12	0.041	101	55	6	107	61	33	79.5	16	0.15	4	0	29	46	45	4	2	0	0	2	1	0	0	1	1	10	3	45.5	44.6	4	2	3	12	33	0	1	0	7	10	40	36
106	612.69	7.659	81.825	50.955	90.358	1.023	0.637	1.129	0.05	80	44	13	83	47	17	58	9	0.108	5	0	12	36	31	2	11	0	0	0	0	0	0	0	0	13	0	45	38.8	2.5	13.8	0	12	19	0	1	0	4	5	24	22
108	285.32	7.926	36.596	24.154	40.242	1.017	0.671	1.118	0.114	36	21	3	39	24	9	30	1	0.026	3	0	6	15	16	1	4	0	0	0	0	0	0	0	0	5	0	41.7	44.4	2.8	11.1	0	6	10	0	1	0	4	12	24	16
109	255.34	7.093	35.825	24.006	40.239	0.995	0.667	1.118	0.129	36	19	2	39	22	8	27	0	0	2	0	6	17	16	1	2	0	0	0	0	0	0	0	0	3	0	47.2	44.4	2.8	5.6	0	7	9	0	1	0	4	12	24	16
110	281.38	7.034	39.709	26.767	44.654	0.993	0.669	1.116	0.119	40	21	1	44	25	8	30	0	0	2	0	6	19	18	1	2	0	0	0	0	0	0	0	0	3	0	47.5	45	2.5	5	0	9	9	0	1	0	5	18	29	19
111	257.23	9.187	29.596	18.296	32.427	1.057	0.653	1.158	0.124	28	18	6	29	19	8	24	1	0.034	2	0	6	10	12	1	2	0	0	3	0	0	0	0	0	6	3	35.7	42.9	3.6	7.1	10.7	3	9	0	1	0	2	3	12	10
114	350.47	8.15	43.003	30.659	47.657	1	0.713	1.108	0.093	43	25	3	46	28	18	38	4	0.087	2	0	16	18	20	2	2	0	1	0	0	0	0	0	1	5	0	41.9	46.5	4.7	4.7	0	4	16	0	1	0	4	6	23	19
118	418.53	7.343	57.116	37.966	63.817	1.002	0.666	1.12	0.073	57	31	3	60	34	19	45	9	0.15	3	0	16	26	25	2	4	0	0	0	0	0	0	0	0	6	0	45.6	43.9	3.5	7	0	7	18	0	1	0	4	6	22	18
130	308.39	8.335	37.774	24.807	41.661	1.021	0.67	1.126	0.105	37	21	6	38	22	14	30.5	5	0.132	3	0	11	16	14	2	4	0	1	0	0	0	0	0	1	7	0	43.2	37.8	5.4	10.8	0	3	11	0	1	0	2	3	12	10
132	277.36	7.704	35.927	24.836	40.567	0.998	0.69	1.127	0.11	36	21	4	38	23	18	33	3	0.079	2	0	16	15	16	5	0	0	0	0	0	0	0	0	0	5	0	41.7	44.4	13.9	0	0	0	16	0	1	0	3	4	17	15
133	386.52	7.888	49.418	32.887	55.278	1.009	0.671	1.128	0.083	49	27	5	51	29	19	39.5	7	0.137	2	0	17	22	19	4	3	0	1	0	0	0	0	0	1	8	0	44.9	38.8	8.2	6.1	0	4	15	0	1	0	3	3	17	17
150	578.79	7.326	79.149	52.091	88.647	1.002	0.659	1.122	0.054	79	41	11	82	44	22	57.5	10	0.122	5	0	17	38	32	2	6	0	1	0	0	0	0	0	1	9	0	48.1	40.5	2.5	7.6	0	12	20	0	1	0	4	6	23	19
152	713.97	7.595	94.8	61.767	105.648	1.009	0.657	1.124	0.044	94	49	14	97	52	24	67.5	15	0.155	7	0	17	45	36	2	9	0	2	0	0	0	0	0	2	13	0	47.9	38.3	2.1	9.6	0	16	20	0	1	-1	4	6	23	19
153	807.06	8.071	101.8	66.159	112.404	1.018	0.662	1.124	0.04	100	54	16	103	57	26	74.5	18	0.175	9	0	17	46	37	2	12	0	3	0	0	0	0	0	3	17	0	46	37	2	12	0	17	20	0	1	-2	4	6	23	19
161	706.97	7.288	96.683	65.137	108.307	0.997	0.672	1.117	0.044	97	51	11	102	56	29	73.5	11	0.108	6	0	23	46	42	2	6	0	1	0	0	0	0	0	1	9	0	47.4	43.3	2.1	6.2	0	14	28	0	1	0	6	10	35	29
162	786.03	7.86	100.8	67.767	111.648	1.008	0.678	1.116	0.04	100	55	13	105	60	31	79.5	13	0.124	8	0	23	45	42	2	9	0	2	0	0	0	0	0	2	13	0	45	42	2	9	0	14	28	0	1	-1	6	10	35	29
166	713.97	7.595	94.8	61.767	105.648	1.009	0.657	1.124	0.044	94	49	14	97	52	24	67.5	15	0.155	7	0	17	45	36	2	9	0	2	0	0	0	0	0	2	13	0	47.9	38.3	2.1	9.6	0	16	20	0	1	-1	4	6	23	19
167	668.92	7.271	91.799	61.375	102.892	0.998	0.667	1.118	0.046	92	48	10	96	52	28	68.5	13	0.135	5	0	23	44	39	2	6	0	1	0	0	0	0	0	1	9	0	47.8	42.4	2.2	6.5	0	13	26	0	1	0	5	7	29	25
171	740.01	7.551	98.683	64.529	110.063	1.007	0.658	1.123	0.042	98	51	14	101	54	25	70.5	16	0.158	8	0	17	47	38	2	9	0	2	0	0	0	0	0	2	13	0	48	38.8	2	9.2	0	16	22	0	1	-1	4	6	23	19
173	792.09	7.473	106.45	70.052	118.894	1.004	0.661	1.122	0.04	106	55	16	110	59	26	76.5	14	0.127	9	0	17	51	42	2	9	0	2	0	0	0	0	0	2	13	0	48.1	39.6	1.9	8.5	0	18	24	0	1	-1	5	9	29	23
174	885.18	7.903	113.45	74.444	125.649	1.013	0.665	1.122	0.036	112	60	18	116	64	28	83.5	17	0.147	11	0	17	52	43	2	12	0	3	0	0	0	0	0	3	17	0	46.4	38.4	1.8	10.7	0	19	24	0	1	-2	5	9	29	23
180	578.08	14.823	42.258	31.091	42.81	1.084	0.797	1.098	0.068	39	33	10	42	36	21	51	4	0.095	9	0	12	6	20	2	9	0	0	0	0	2	0	0	2	13	2	15.4	51.3	5.1	23.1	5.1	0	20	0	1	-2	4	7	24	20
184	193.27	6.664	28.942	18.245	32.823	0.998	0.629	1.132	0.154	29	14	4	29	14	7	18	4	0.138	1	0	6	15	11	1	2	0	0	0	0	0	0	0	0	3	0	51.7	37.9	3.4	6.9	0	4	7	0	1	0	1	1	6	6
197	1190.53	8.325	144.978	98.677	159.438	1.014	0.69	1.115	0.027	143	82	18	150	89	45	120	22	0.147	14	1	30	61	60	4	14	0	4	0	0	0	0	0	4	22	0	42.7	42	2.8	9.8	0	19	39	2	1	-3	8	13	48	40
198	1054.33	8.503	126.771	84.085	138.987	1.022	0.678	1.121	0.031	124	71	19	129	76	34	101	22	0.171	16	0	18	53	48	4	15	0	4	0	0	0	0	0	4	23	0	42.7	38.7	3.2	12.1	0	18	30	0	1	-3	6	8	33	29
202	1318.63	8.91	152.422	101.153	165.744	1.03	0.683	1.12	0.025	148	87	25	155	94	45	125	24	0.155	17	0	28	61	56	4	21	0	6	0	0	0	0	0	6	31	0	41.2	37.8	2.7	14.2	0	22	34	0	1	-5	8	14	45	37
208	1100.45	7.974	139.079	94.29	154.181	1.008	0.683	1.117	0.029	138	77	15	145	84	41	111	20	0.138	10	1	30	61	58	5	11	0	3	0	0	0	0	0	3	19	0	44.2	42	3.6	8	0	18	38	2	1	-2	8	13	48	40
213	1762.45	8.433	212.937	143.625	235.429	1.019	0.687	1.126	0.019	209	115	25	220	126	62	164	49	0.223	14	0	48	94	71	11	24	0	6	0	0	0	0	0	9	44	0	45	34	5.3	11.5	0	36	35	0	1	-3	12	561	68	36
214	1762.45	8.433	212.937	143.625	235.429	1.019	0.687	1.126	0.019	209	115	25	220	126	62	164	49	0.223	14	0	48	94	71	11	24	0	6	0	0	0	0	0	9	44	0	45	34	5.3	11.5	0	36	35	0	1	-3	12	561	68	36
217	1122.46	8.193	139.305	92.131	153.647	1.017	0.672	1.122	0.029	137	76	19	143	82	34	107	22	0.154	16	0	18	61	53	4	15	0	4	0	0	0	0	0	4	23	0	44.5	38.7	2.9	10.9	0	23	30	0	1	-3	7	9	39	35
222	1023.31	8.457	123.341	82.625	135.279	1.019	0.683	1.118	0.032	121	69	18	126	74	33	99	19	0.151	14	1	18	52	48	3	14	0	4	0	0	0	0	0	4	21	0	43	39.7	2.5	11.6	0	18	28	2	1	-3	6	8	34	30
225	1244.58	8.353	151.189	102.892	166.063	1.015	0.691	1.115	0.026	149	86	18	157	94	46	126	21	0.134	15	1	30	63	63	4	15	0	4	0	0	0	0	0	4	23	0	42.3	42.3	2.7	10.1	0	20	41	2	1	-3	9	14	54	46
228	923.18	7.89	118.207	78.966	130.811	1.01	0.675	1.118	0.034	117	65	13	123	71	31	93	18	0.146	13	0	18	52	49	3	11	0	2	0	0	0	0	0	2	16	0	44.4	41.9	2.6	9.4	0	17	32	0	1	-1	7	9	39	35
229	827.11	7.658	108.509	72.671	120.686	1.005	0.673	1.117	0.038	108	58	12	113	63	28	82	16	0.142	10	0	18	50	45	2	9	0	2	0	0	0	0	0	2	13	0	46.3	41.7	1.9	8.3	0	17	28	0	1	-2	6	8	34	30
238	292.46	6.358	44.923	30.387	51.564	0.977	0.661	1.121	0.104	46	22	4	48	24	16	32	4	0.083	0	0	16	24	20	2	0	0	0	0	0	0	0	0	0	2	0	52.2	43.5	4.3	0	0	6	14	0	1	0	3	6	18	14
240	366.46	7.479	49.342	32.239	55.358	1.007	0.658	1.13	0.083	49	27	3	51	29	18	38.5	8	0.157	1	0	17	22	20	4	3	0	0	0	0	0	0	0	0	7	0	44.9	40.8	8.2	6.1	0	5	15	0	1	0	3	3	17	17
244	398.5	7.663	52.014	35.784	58.149	1	0.688	1.118	0.08	52	30	1	57	35	22	46.5	4	0.07	1	0	21	22	24	4	2	0	0	0	0	0	0	0	0	6	0	42.3	46.2	7.7	3.8	0	6	18	0	1	0	6	19	35	25
251	284.24	9.475	31.956	19.511	34.59	1.065	0.65	1.153	0.111	30	20	7	31	21	9	27	2	0.065	3	0	6	10	12	2	4	0	0	2	0	0	0	0	0	8	2	33.3	40	6.7	13.3	6.7	2	10	0	1	0	2	3	12	10
259	628.76	7.859	79.767	57.25	88.062	0.997	0.716	1.101	0.05	80	48	10	88	56	34	76	2	0.023	6	0	28	32	42	2	4	0	0	0	0	0	0	0	0	6	0	40	52.5	2.5	5	0	8	34	0	1	0	9	65	54	34
275	368.3	9.954	38.964	26.716	41.218	1.053	0.722	1.114	0.085	37	27	6	40	30	17	41	2	0.05	5	0	12	10	20	0	5	0	0	2	0	0	0	0	0	7	2	27	54.1	0	13.5	5.4	0	20	0	1	0	4	7	24	20
285	789.62	8.774	90.698	64.733	99.997	1.008	0.719	1.111	0.044	90	53	13	97	60	28	77	9	0.093	6	0	22	37	42	3	4	0	0	0	4	0	0	0	4	11	4	41.1	46.7	3.3	4.4	4.4	14	28	0	1	0	8	64	48	28
286	809.6	9.2	88.931	65.21	97.167	1.011	0.741	1.104	0.042	88	55	14	96	63	34	83	5	0.052	6	0	28	33	44	3	4	0	0	0	4	0	0	0	4	11	4	37.5	50	3.4	4.5	4.5	10	34	0	1	0	9	65	54	34
287	845.74	8.292	102.232	71.779	113.658	1.002	0.704	1.114	0.04	102	57	14	109	64	28	81	12	0.11	6	0	22	45	46	3	4	0	0	0	4	0	0	0	4	11	4	44.1	45.1	2.9	3.9	3.9	18	28	0	1	0	8	64	48	28
290	1300.86	6.705	191.453	128.439	216.685	0.987	0.662	1.117	0.023	194	97	22	205	108	52	137	24	0.117	6	0	46	97	86	3	8	0	0	0	0	0	0	0	0	11	0	50	44.3	1.5	4.1	0	34	52	0	1	0	12	68	72	52
296	353.52	6.798	50.865	35.767	57.771	0.978	0.688	1.111	0.085	52	27	2	55	30	20	41.5	4	0.073	3	0	17	25	25	2	0	0	0	0	0	0	0	0	0	2	0	48.1	48.1	3.8	0	0	4	21	0	1	1	4	6	24	20
332	202.26	7.779	25.418	19.807	28.076	0.978	0.762	1.08	0.158	26	16	0	29	19	19	28.5	0	0	0	0	19	10	16	0	0	0	0	0	0	0	0	0	0	0	0	38.5	61.5	0	0	0	0	16	0	1	0	4	14	24	14
340	443.61	6.931	63.498	42.415	71.645	0.992	0.663	1.119	0.068	64	33	6	67	36	17	47	7	0.104	5	0	12	31	28	2	3	0	0	0	0	0	0	0	0	5	0	48.4	43.8	3.1	4.7	0	8	20	0	1	1	4	7	24	20
353	973.64	26.315	39.509	40.909	39.197	1.068	1.106	1.059	0.068	37	33	12	40	36	17	47	2	0.05	5	0	12	4	20	0	5	0	0	0	4	0	4	0	8	13	8	10.8	54.1	0	13.5	21.6	0	20	0	1	0	4	7	24	20
378	818.04	8.02	103.447	68.472	114.439	1.014	0.671	1.122	0.041	102	57	8	110	65	27	83	12	0.109	9	0	18	45	41	4	10	0	2	0	0	0	0	0	2	16	0	44.1	40.2	3.9	9.8	0	19	22	0	1	1	9	41	53	37
392	392.67	5.861	65.268	42.342	75.761	0.974	0.632	1.131	0.076	67	29	5	69	31	16	39	10	0.145	0	0	16	38	26	3	0	0	0	0	0	0	0	0	0	3	0	56.7	38.8	4.5	0	0	13	13	0	1	1	3	6	18	14
405	187.16	9.851	19.851	13.892	20.957	1.045	0.731	1.103	0.165	19	14	3	20	15	9	22	0	0	2	1	6	5	10	1	3	0	0	0	0	0	0	0	0	4	0	26.3	52.6	5.3	15.8	0	0	9	1	1	0	2	3	12	10
411	445.68	6.367	68.821	45.245	78.681	0.983	0.646	1.124	0.068	70	33	2	73	36	18	46	12	0.164	2	0	16	37	29	2	2	0	0	0	0	0	0	0	0	4	0	52.9	41.4	2.9	2.9	0	12	17	0	1	1	4	6	22	18
435	282.33	9.411	30.476	22.818	32.624	1.016	0.761	1.087	0.121	30	20	3	33	23	21	34.5	1	0.03	2	0	19	10	16	0	3	0	1	0	0	0	0	0	1	4	0	33.3	53.3	0	10	0	0	16	0	1	0	4	14	24	14
436	385.21	11.673	32.8	26.688	35.919	0.994	0.809	1.088	0.114	33	21	2	36	24	20	34.5	1	0.028	1	0	19	12	18	1	1	0	0	0	0	0	1	0	1	3	1	36.4	54.5	3	3	3	1	17	0	1	0	4	14	24	14
[truncated: 2,099 more columns]
